# Supplementary material
Source: Research Square preprint supplement (doi:10.21203/rs.3.rs-9138936/v1)
Supplement: Supplementary file 1 [file 0ce05b7eac9d87e09327f0cc.docx]

**CARE CHECKLIST**

**Manuscript Title:**
*When Mumps Silences an Ear: Audiovestibular Findings in Sudden Unilateral Hearing Loss – A Case Report*

| Topic | Item No. | Checklist Item Description | Page | Line |
| --- | --- | --- | --- | --- |
| Title | 1 | Diagnosis/intervention + “case report” | 1 | 1–2 |
| Keywords | 2 | Not applicable as per journal guidelines | NA | NA |
| Abstract | 3a | Background (importance of case) | 1 | 3–10 |
|  | 3b | Symptoms/clinical findings | 1 | 11–20 |
|  | 3c | Diagnosis, intervention, outcomes | 1–2 | 21–40 |
|  | 3d | Conclusion (take-away message) | 2 | 1–6 |
| Introduction | 4 | Background and rationale | 3 | 1–25 |
| Patient Information | 5a | Demographics | 4 | 1–3 |
|  | 5b | Symptoms | 4 | 4–10 |
|  | 5c | Medical/family history | 4 | 11–18 |
|  | 5d | Past interventions | NA | NA |
| Clinical Findings | 6 | Examination findings | 5 | 1–15 |
| Diagnostic Assessment | 8a | Diagnostic tests | 5–7 | 1–30 |
|  | 8b | Diagnostic challenges | 9 | 20–25 |
|  | 8c | Diagnosis | 6 | 10–20 |
|  | 8d | Prognosis | 9 | 10–18 |
| Therapeutic Intervention | 9a | Type of treatment | 7 | 25–30 |
|  | 9b | Treatment details | 7 | 30–40 |
|  | 9c | Changes in treatment | NA | NA |
| Follow-up & Outcomes | 10a | Outcomes | 7 | 35–40 |
|  | 10b | Follow-up results | 7–8 | 1–10 |
|  | 10c | Adherence/tolerability | 7 | 38–40 |
|  | 10d | Adverse events | NA | NA |
| Discussion | 11a | Strengths & limitations | 9 | 1–10 |
|  | 11b | Literature comparison | 8–9 | 1–30 |
|  | 11c | Rationale for conclusions | 9 | 1–15 |
|  | 11d | Take-home message | 9 | 16–25 |
| Patient Perspective | 12 | Patient perspective | NA | NA |
